# Supplementary material
Source: PubMed Central journal article supplement (PMC4562879)

**Supplementary Table 1** Age and sex composition of the GWAS and replication studies

| Study population                      | Cases*      |                 |                 | Controls†   |                 |                 | Ethnicity | Genotyping Platform           |
|---------------------------------------|-------------|-----------------|-----------------|-------------|-----------------|-----------------|-----------|-------------------------------|
|                                       | Sample size | Age (mean±s.d.) | Sex ratio (M/F) | Sample size | Age (mean±s.d.) | Sex ratio (M/F) |           |                               |
| <b>GWAS groups</b>                    |             |                 |                 |             |                 |                 |           |                               |
| Children                              | 246         | 4.4±4.1         | 169/77          | 108         | 9.5±3.1         | 49/59           | Korean    | Axiom                         |
| Adults                                | NA          | NA              | NA              | 551         | 65.0±8.4        | 211/340         | Korean    | 5.0                           |
| <b>Replication group<sup>13</sup></b> |             |                 |                 |             |                 |                 |           |                               |
| Adults                                | 1,472       | 28.6±9.2        | 807/665         | 7,966       | 49.1±17.6       | 4,588/3,378     | Japanese  | Illumina Human OmniExpress-12 |

\*Cases included children with both moderate to severe AD (SCORAD  $\geq$  30; mean  $\pm$  SD, 59.9  $\pm$  14.4), and allergic sensitization (positive specific IgE to  $\geq$ 1 food or airborne allergen).

†Controls included subjects without history of allergic diseases or evidence of allergic sensitization (negative skin prick tests or negative specific IgE to common allergens).

Children cases and adult controls were used for the GWAS analysis.

Children controls were used for the association studies of selected SNPs with total serum IgE.

**Supplementary Table2** Summary of association results from the discovery GWAS and replication stage

| Genes or nearby genes | Location | SNP ID      | Position  | Alleles (risk/alt) | Discovery GWAS |             |          |       |               | Replication stage (Japanese group) |        |       |       |
|-----------------------|----------|-------------|-----------|--------------------|----------------|-------------|----------|-------|---------------|------------------------------------|--------|-------|-------|
|                       |          |             |           |                    | RAF Case       | RAF Control | P        | OR    | 95% CI        | RAF                                | Beta   | SE    | P     |
| <i>NBAS</i>           | 2p24.3   | rs13403179  | 15482752  | C/G                | 0.131          | 0.054       | 8.07E-08 | 2.947 | (1.989-4.386) | 0.032                              | 0.043  | 0.113 | 0.705 |
|                       |          | rs13428288  | 15482611  | G/A                | 0.131          | 0.054       | 8.20E-08 | 2.946 | (1.988-4.385) | 0.032                              | 0.043  | 0.113 | 0.704 |
|                       |          | rs16862519  | 15481752  | T/C                | 0.131          | 0.054       | 9.03E-08 | 2.943 | (1.984-4.384) | 0.032                              | 0.043  | 0.113 | 0.704 |
|                       |          | rs75790198  | 15481366  | T/C                | 0.130          | 0.054       | 1.00E-07 | 2.936 | (1.978-4.375) | 0.032                              | 0.043  | 0.113 | 0.703 |
|                       |          | rs13398948  | 15481147  | A/G                | 0.129          | 0.055       | 1.54E-07 | 2.903 | (1.952-4.334) | 0.032                              | 0.044  | 0.114 | 0.701 |
|                       |          | rs13409223  | 15480569  | C/T                | 0.129          | 0.055       | 1.67E-07 | 2.898 | (1.948-4.328) | 0.032                              | 0.044  | 0.114 | 0.701 |
|                       |          | rs147759857 | 15485351  | A/T                | 0.125          | 0.054       | 4.55E-07 | 2.826 | (1.890-4.243) | 0.032                              | 0.043  | 0.113 | 0.705 |
|                       |          | rs114663129 | 15486515  | T/C                | 0.124          | 0.054       | 5.94E-07 | 2.810 | (1.875-4.226) | 0.032                              | 0.043  | 0.113 | 0.705 |
| <i>THEMIS</i>         | 6q22.33  | rs675531    | 128040839 | C/T                | 0.205          | 0.113       | 6.82E-07 | 2.193 | (1.610-2.994) | 0.164                              | -0.017 | 0.054 | 0.755 |
| <i>GATA3</i>          | 10p14    | rs35766269  | 9023815   | A/T                | 0.717          | 0.580       | 9.61E-08 | 1.946 | (1.529-2.494) | 0.654                              | -0.013 | 0.043 | 0.767 |
|                       |          | rs12253258  | 9024290   | T/C                | 0.717          | 0.580       | 9.72E-08 | 1.946 | (1.529-2.494) | 0.654                              | -0.012 | 0.043 | 0.778 |
|                       |          | rs34385685  | 9007216   | T/A                | 0.689          | 0.557       | 4.49E-07 | 1.843 | (1.458-2.342) | 0.630                              | -0.022 | 0.042 | 0.604 |
| <i>PCDH9</i>          | 13q21.31 | rs9540294   | 65564031  | G/T                | 0.181          | 0.083       | 1.01E-08 | 2.655 | (1.904-3.717) | 0.117                              | -0.047 | 0.064 | 0.454 |
|                       |          | rs9540299   | 65568331  | T/C                | 0.178          | 0.083       | 2.24E-08 | 2.614 | (1.869-3.669) | 0.117                              | -0.048 | 0.064 | 0.453 |
|                       |          | rs9540298   | 65567319  | T/C                | 0.186          | 0.088       | 2.97E-08 | 2.515 | (1.818-3.493) | 0.122                              | -0.058 | 0.063 | 0.354 |
|                       |          | rs9598920   | 65569199  | T/G                | 0.184          | 0.088       | 4.06E-08 | 2.499 | (1.804-3.474) | 0.122                              | -0.058 | 0.063 | 0.353 |
|                       |          | rs9598921   | 65569216  | T/C                | 0.184          | 0.088       | 4.12E-08 | 2.498 | (1.804-3.473) | 0.122                              | -0.058 | 0.063 | 0.353 |
|                       |          | rs9540302   | 65571257  | G/A                | 0.172          | 0.083       | 8.66E-08 | 2.536 | (1.806-3.573) | 0.117                              | -0.048 | 0.064 | 0.451 |
|                       |          | rs4600354   | 65574724  | G/A                | 0.170          | 0.083       | 1.58E-07 | 2.498 | (1.776-3.525) | 0.117                              | -0.048 | 0.064 | 0.452 |
|                       |          | rs7993759   | 65575511  | G/A                | 0.178          | 0.088       | 1.79E-07 | 2.415 | (1.736-3.370) | 0.122                              | -0.058 | 0.063 | 0.353 |
|                       |          | rs9540309   | 65575966  | C/T                | 0.178          | 0.088       | 1.86E-07 | 2.413 | (1.735-3.368) | 0.122                              | -0.058 | 0.063 | 0.352 |
|                       |          | rs9598922   | 65577047  | G/C                | 0.169          | 0.083       | 1.96E-07 | 2.484 | (1.765-3.507) | 0.117                              | -0.048 | 0.063 | 0.451 |
|                       |          | rs9528865   | 65564293  | A/G                | 0.267          | 0.160       | 3.35E-07 | 2.044 | (1.555-2.695) | 0.214                              | -0.023 | 0.049 | 0.629 |
|                       |          | rs4293255   | 65562307  | T/C                | 0.265          | 0.160       | 5.49E-07 | 2.022 | (1.536-2.667) | 0.214                              | -0.022 | 0.049 | 0.653 |
|                       |          | rs9564212   | 65566594  | C/T                | 0.265          | 0.160       | 5.56E-07 | 2.020 | (1.535-2.665) | 0.214                              | -0.024 | 0.049 | 0.626 |
|                       |          | rs7987130   | 65557327  | T/C                | 0.164          | 0.083       | 8.42E-07 | 2.380 | (1.687-3.368) | 0.117                              | -0.047 | 0.064 | 0.456 |
| <i>SCAPER</i>         | 15q24.3  | rs3099143   | 77104856  | C/A                | 0.239          | 0.137       | 3.02E-07 | 2.126 | (1.594-2.841) | 0.123                              | -0.072 | 0.063 | 0.252 |
|                       |          | rs2046415   | 77085253  | G/A                | 0.235          | 0.134       | 4.31E-07 | 2.096 | (1.575-2.798) | 0.122                              | -0.066 | 0.063 | 0.291 |
|                       |          | rs1114717   | 77086078  | A/G                | 0.235          | 0.134       | 4.36E-07 | 2.096 | (1.574-2.797) | 0.121                              | -0.066 | 0.063 | 0.291 |
|                       |          | rs3110379   | 77095175  | G/A                | 0.235          | 0.135       | 4.56E-07 | 2.094 | (1.573-2.795) | 0.121                              | -0.067 | 0.063 | 0.288 |
|                       |          | rs901008    | 77097018  | A/C                | 0.235          | 0.135       | 4.64E-07 | 2.093 | (1.572-2.794) | 0.121                              | -0.067 | 0.063 | 0.288 |
|                       |          | rs3110381   | 77099665  | T/A                | 0.235          | 0.135       | 4.70E-07 | 2.092 | (1.571-2.793) | 0.121                              | -0.067 | 0.063 | 0.287 |
|                       |          | rs3106380   | 77104377  | A/G                | 0.235          | 0.135       | 4.84E-07 | 2.091 | (1.570-2.792) | 0.121                              | -0.067 | 0.063 | 0.287 |
|                       |          | rs3099142   | 77104909  | T/C                | 0.235          | 0.135       | 4.95E-07 | 2.090 | (1.570-2.791) | 0.121                              | -0.067 | 0.063 | 0.287 |
|                       |          | rs4886831   | 77106801  | T/C                | 0.235          | 0.135       | 4.98E-07 | 2.090 | (1.569-2.791) | 0.121                              | -0.067 | 0.063 | 0.286 |
|                       |          | rs78020233  | 77107050  | G/T                | 0.235          | 0.135       | 5.00E-07 | 2.090 | (1.569-2.790) | 0.121                              | -0.067 | 0.063 | 0.286 |
|                       |          | rs3102712   | 77058926  | A/G                | 0.235          | 0.136       | 5.68E-07 | 2.097 | (1.570-2.807) | 0.122                              | -0.063 | 0.063 | 0.312 |
|                       |          | rs3102710   | 77061148  | C/T                | 0.235          | 0.136       | 5.69E-07 | 2.097 | (1.570-2.807) | 0.122                              | -0.064 | 0.063 | 0.311 |
|                       |          | rs280024    | 77034518  | C/A                | 0.235          | 0.136       | 6.03E-07 | 2.096 | (1.569-2.808) | 0.122                              | -0.060 | 0.062 | 0.337 |

|             |          |     |       |       |          |       |               |       |        |       |       |
|-------------|----------|-----|-------|-------|----------|-------|---------------|-------|--------|-------|-------|
| rs280028    | 77031466 | G/A | 0.235 | 0.136 | 6.14E-07 | 2.096 | (1.568-2.807) | 0.122 | -0.059 | 0.062 | 0.338 |
| rs280029    | 77031235 | G/A | 0.235 | 0.136 | 6.16E-07 | 2.095 | (1.568-2.807) | 0.122 | -0.059 | 0.062 | 0.338 |
| rs3102709   | 77072260 | T/C | 0.235 | 0.136 | 6.24E-07 | 2.088 | (1.564-2.793) | 0.122 | -0.065 | 0.063 | 0.303 |
| rs3106378   | 77110524 | C/A | 0.235 | 0.136 | 6.39E-07 | 2.077 | (1.559-2.774) | 0.121 | -0.070 | 0.064 | 0.272 |
| rs111406539 | 77076517 | C/T | 0.235 | 0.136 | 6.45E-07 | 2.084 | (1.562-2.787) | 0.122 | -0.065 | 0.063 | 0.302 |
| rs3099140   | 77111012 | A/G | 0.235 | 0.136 | 6.53E-07 | 2.076 | (1.558-2.773) | 0.121 | -0.070 | 0.064 | 0.272 |
| rs3099139   | 77112291 | G/A | 0.235 | 0.136 | 6.54E-07 | 2.076 | (1.558-2.773) | 0.121 | -0.070 | 0.064 | 0.272 |
| rs3099138   | 77115524 | A/G | 0.235 | 0.136 | 6.68E-07 | 2.075 | (1.557-2.772) | 0.121 | -0.070 | 0.064 | 0.268 |
| rs4886832   | 77121196 | G/A | 0.235 | 0.136 | 6.89E-07 | 2.074 | (1.556-2.770) | 0.121 | -0.071 | 0.064 | 0.263 |
| rs3099137   | 77123626 | A/G | 0.235 | 0.137 | 6.92E-07 | 2.073 | (1.556-2.769) | 0.121 | -0.071 | 0.064 | 0.263 |
| rs111908804 | 77123773 | G/C | 0.235 | 0.137 | 6.94E-07 | 2.073 | (1.556-2.769) | 0.121 | -0.071 | 0.064 | 0.263 |
| rs3099134   | 77133168 | G/T | 0.235 | 0.137 | 7.48E-07 | 2.069 | (1.553-2.764) | 0.121 | -0.071 | 0.064 | 0.261 |
| rs141545456 | 77014367 | T/C | 0.228 | 0.132 | 8.82E-07 | 2.078 | (1.554-2.787) | 0.118 | -0.066 | 0.065 | 0.307 |
| rs3110378   | 77127983 | A/G | 0.234 | 0.137 | 9.57E-07 | 2.059 | (1.544-2.753) | 0.121 | -0.071 | 0.064 | 0.263 |

---

RAF, risk allele frequency; OR, odds ratio; CI, confidence interval; SE, standard error.

**Supplementary Figure 1** Regional association plots at the 13q21.31 (a), 2p24.3 (b), 6q22.33 (c), and 10p14 (d) loci for recalcitrant atopic dermatitis. For each plot, the  $-\log_{10} P$  value (left y axis) of each SNP is shown according to its chromosomal position ( $x$  axis). Genetic recombination rates are shown by the blue line, and horizontal arrows indicate the locations of genes and direction of transcription. The most associated SNP (labeled by rs number) is shown as a purple circle, and its LD ( $r^2$ ) with all other SNPs is indicated by color.

**Supplementary Figure 2** Box plots comparing total serum IgE between cases and controls in children. Total serum IgE levels are higher in cases than in controls ( $6.443 \pm 1.449$  vs.  $3.260 \pm 0.941$  ln kU/l, respectively,  $P = 2.2 \times 10^{-16}$ ).



Supplementary Figure 1b

Plotted SNPs

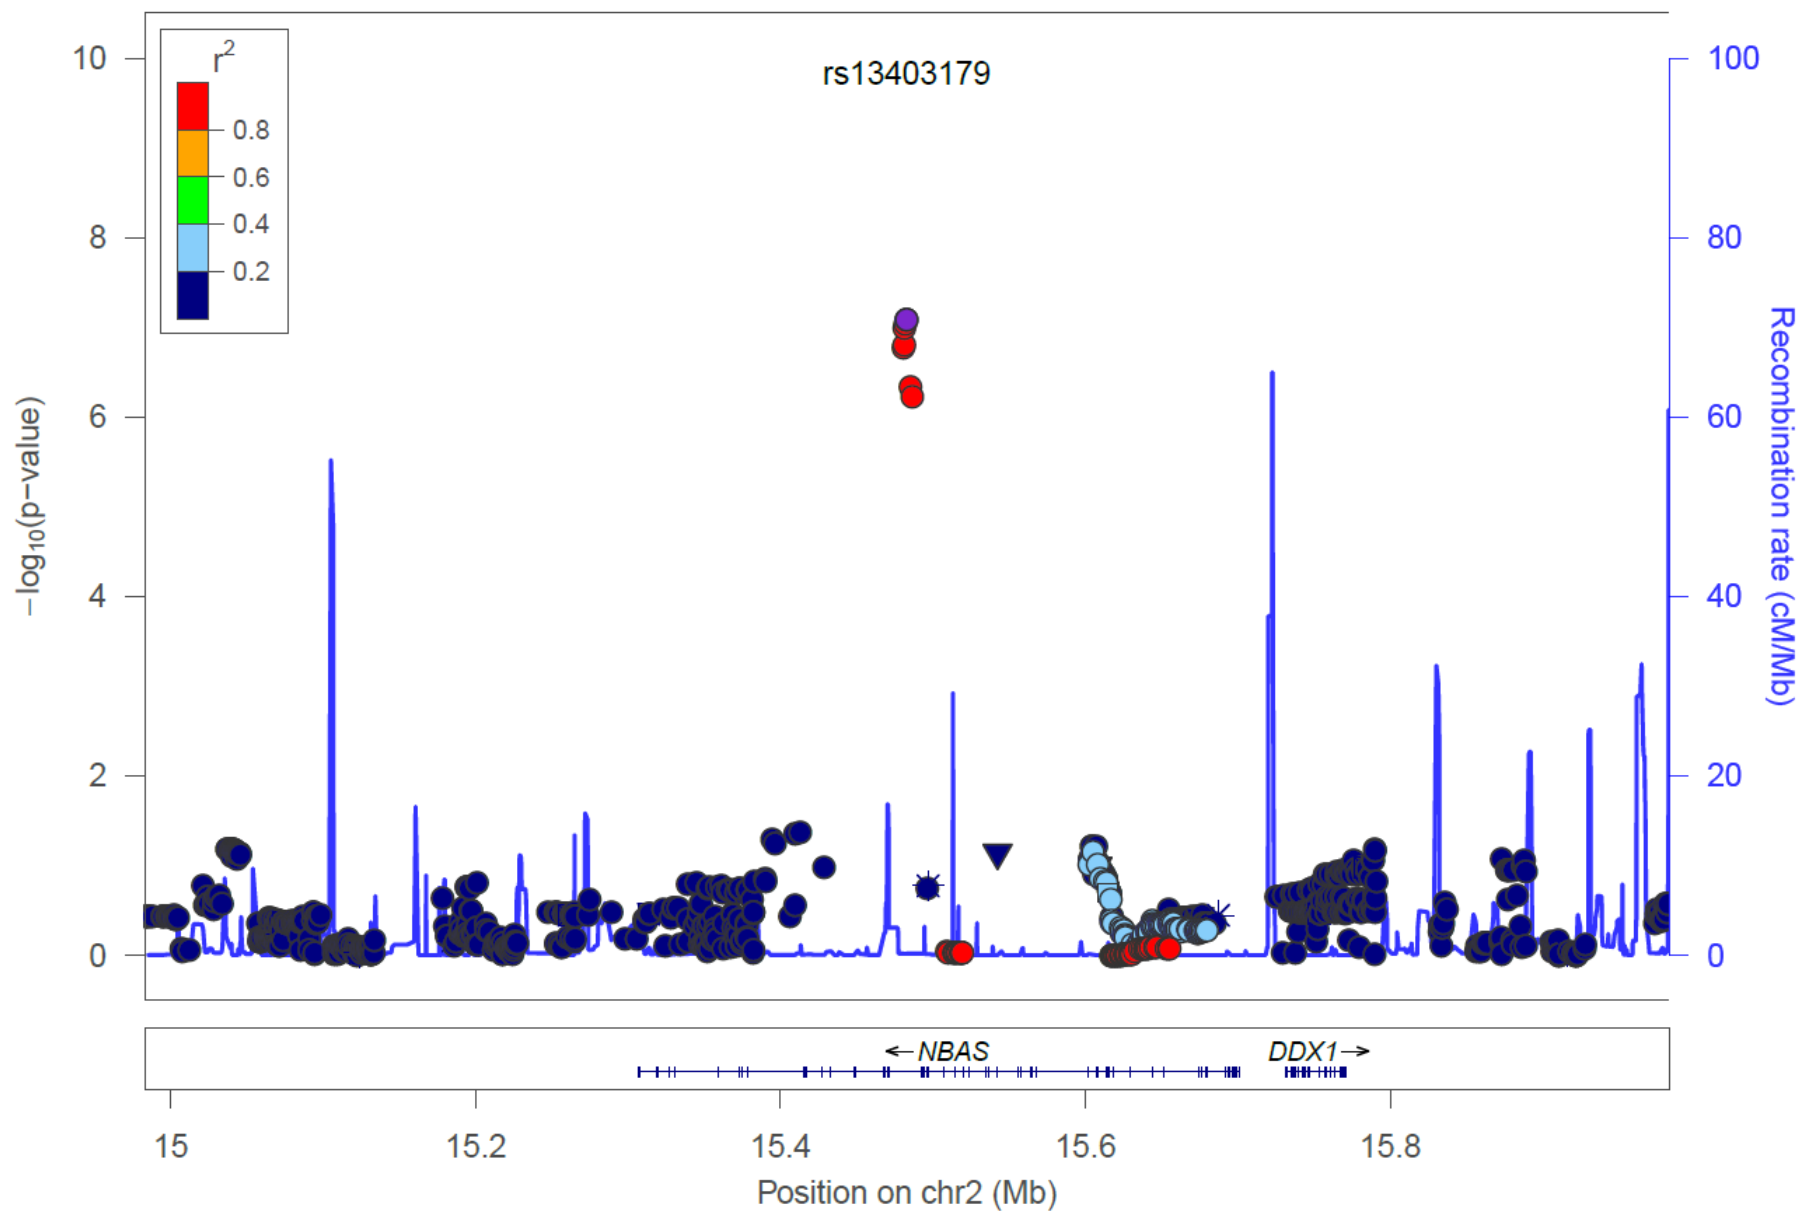

# Supplementary Figure 1c

Plotted SNPs

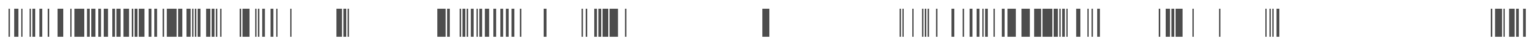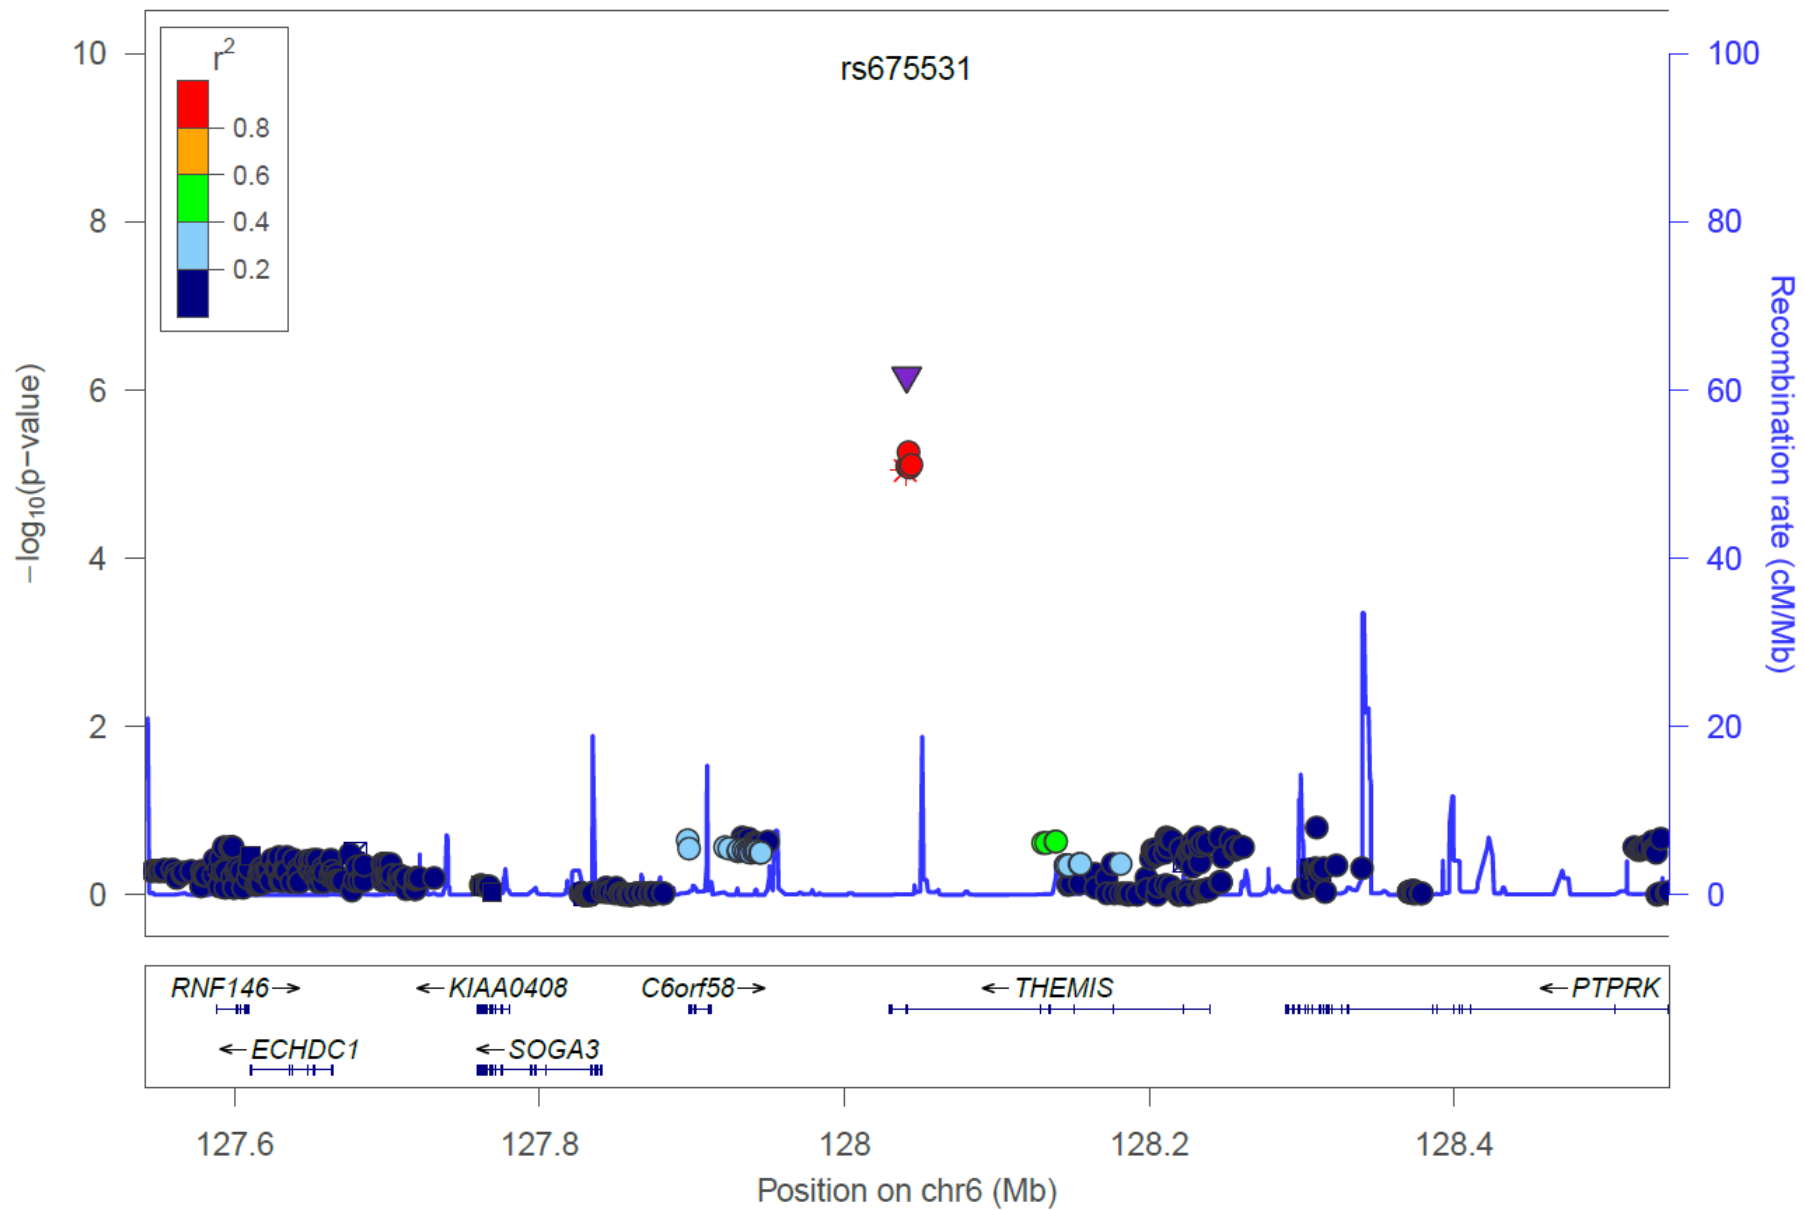

Supplementary Figure 1d

Plotted SNPs

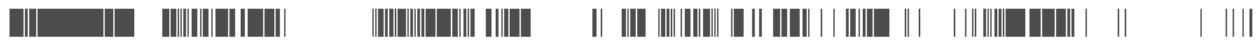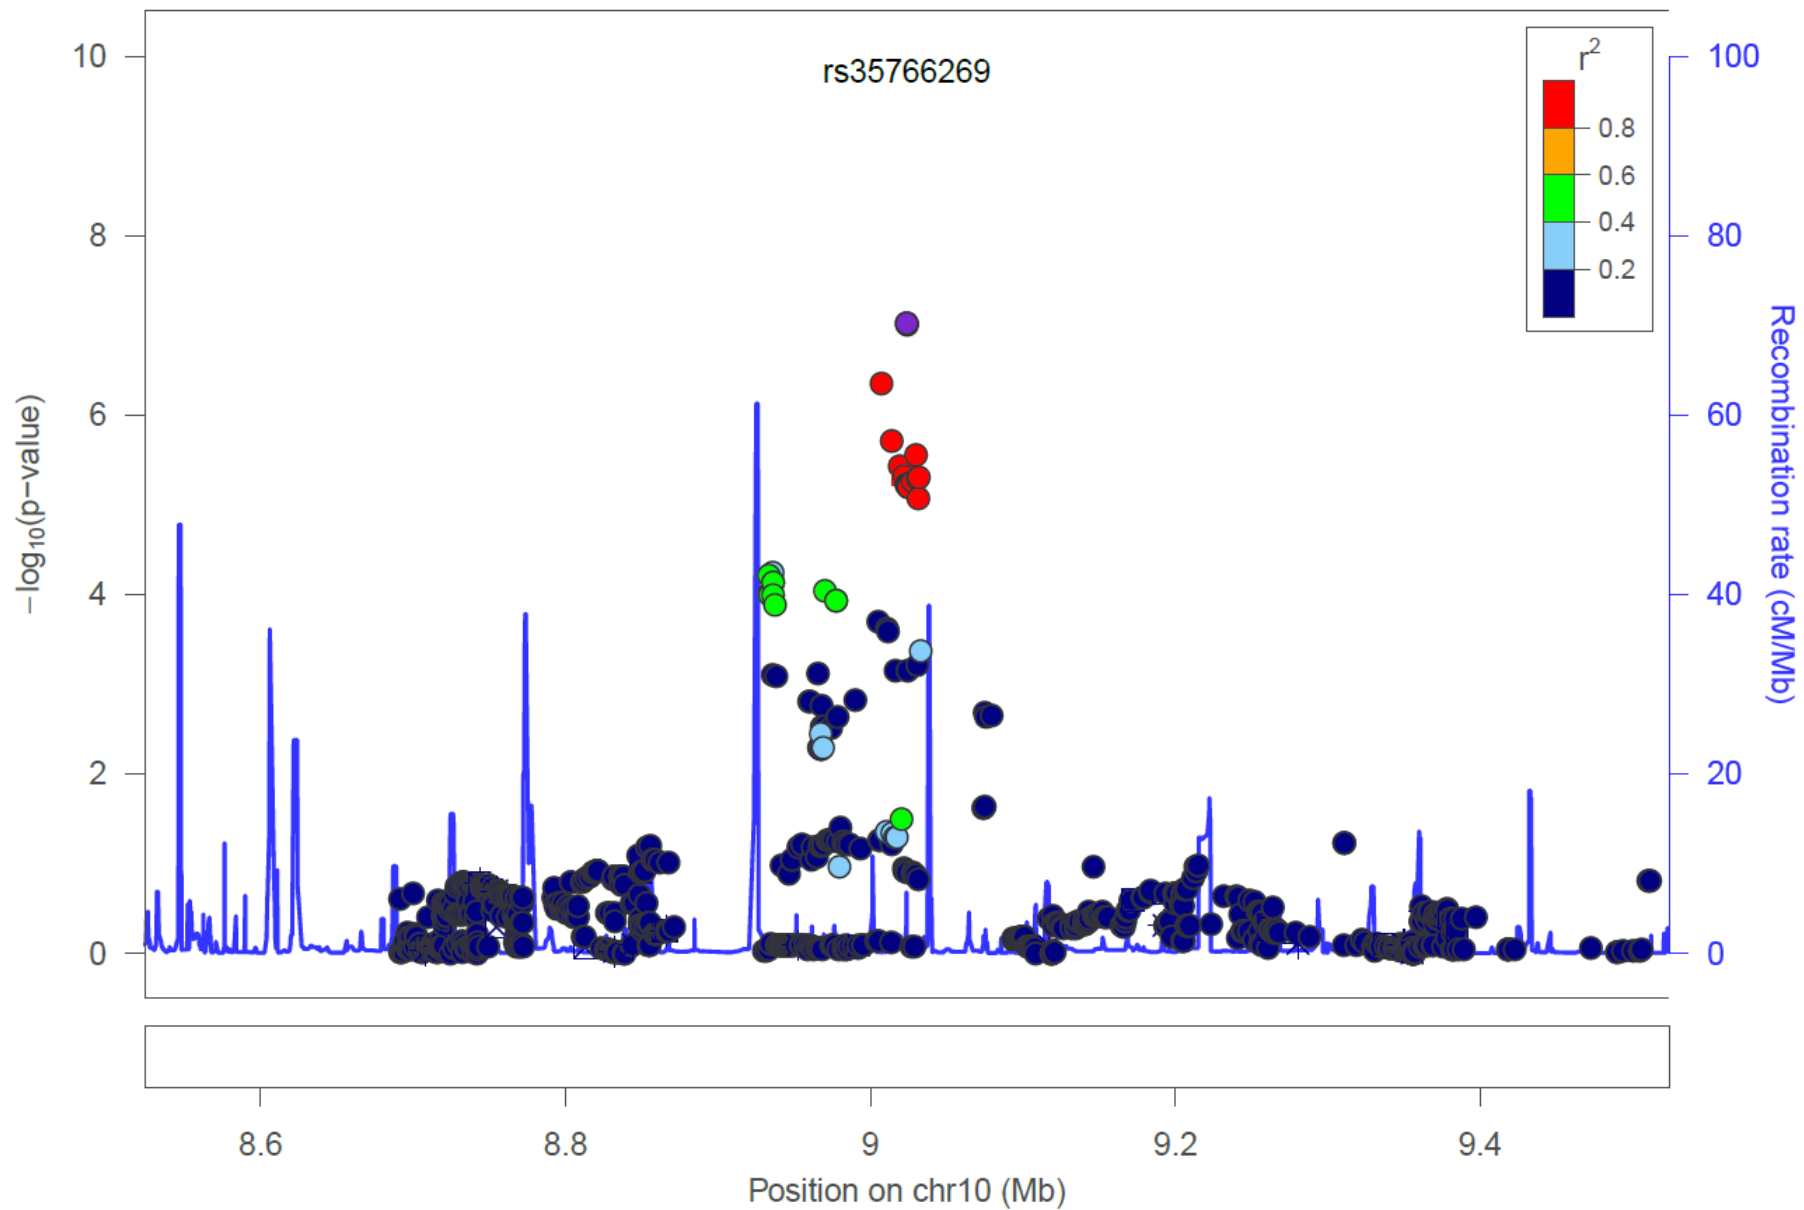



Supplementary Figure 2

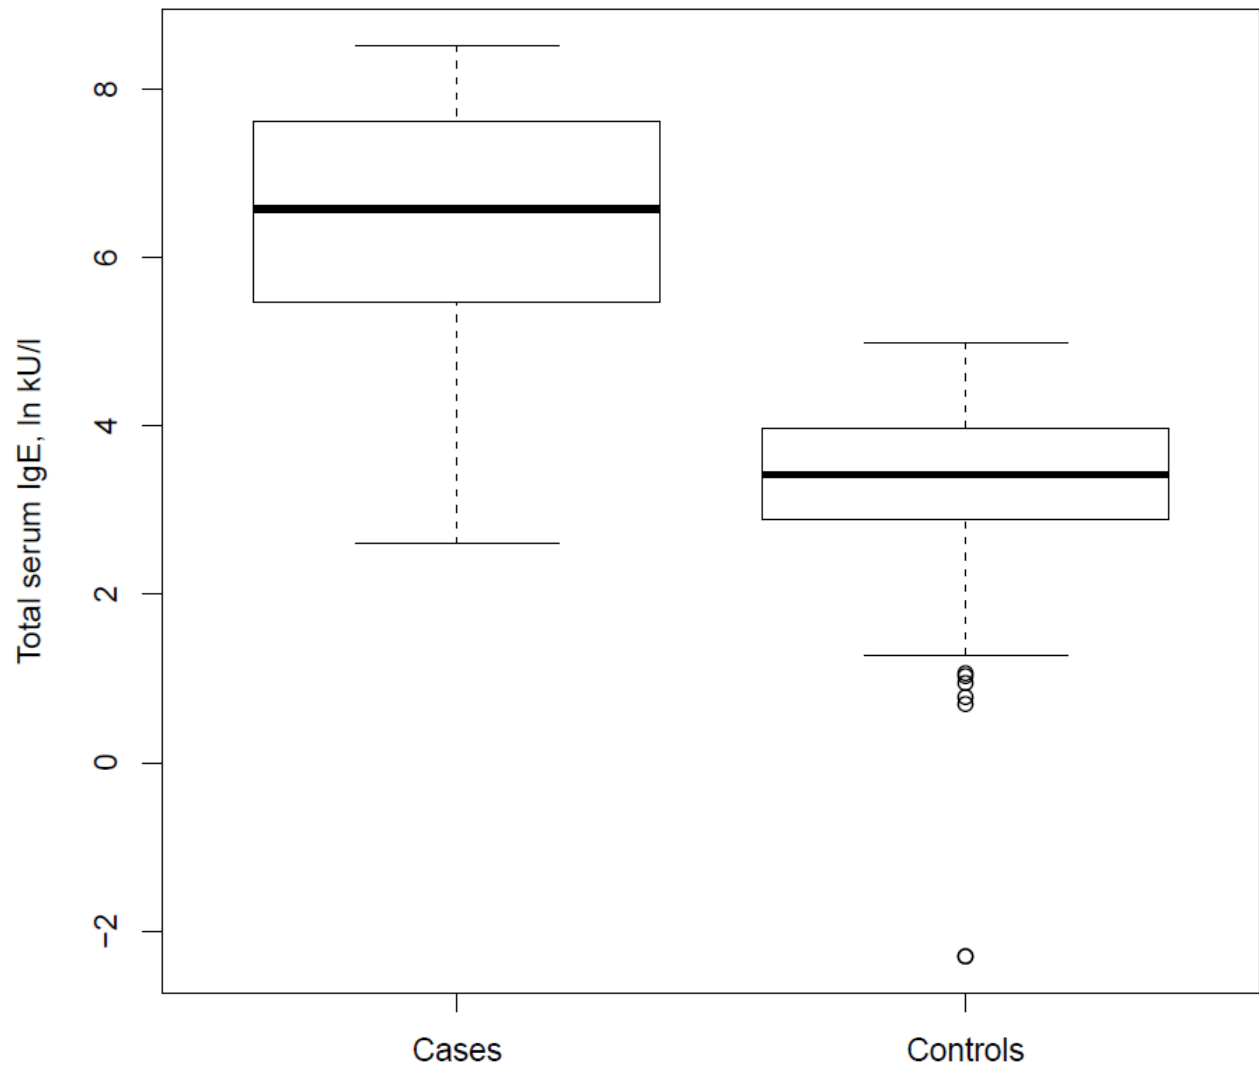

Supplement: NIHMS686758-supplement-supplement_1.pdf [file NIHMS686758-supplement-supplement_1.pdf]
